# Supplementary material
Source: PubMed Central journal article supplement (PMC2949012)
Supplement: pp.110.160051_1.pdf [file pp.110.160051_1.pdf]

Figure S1

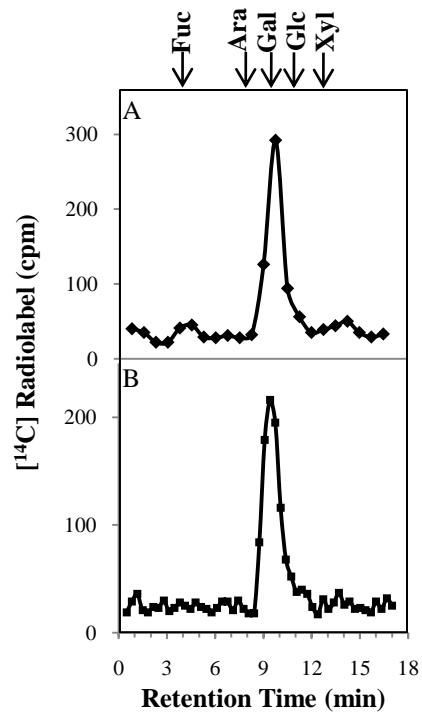

Figure S1. Monosaccharide analysis of the RP-HPLC purified tobacco d[AO]<sub>51</sub>:GalT reaction product (Panel A) and the Arabidopsis [AO]<sub>7</sub>:GalT reaction product (Panel B). The [<sup>14</sup>C]-labeled monosaccharides were analyzed by High-Performance Anion-Exchange Chromatography (HPAEC) on a CarboPac PA-10 column. Elution times of monosaccharide standards are as indicated with arrows at the top.

Figure S2

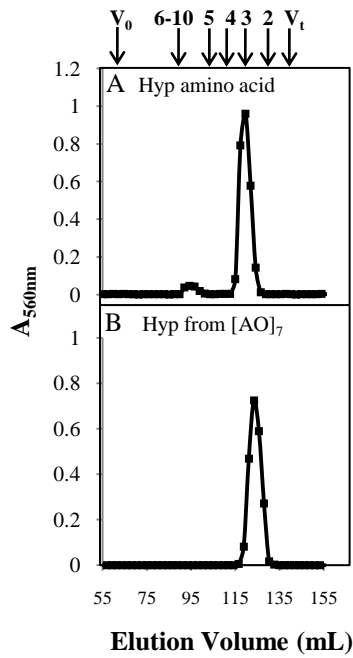

Figure S2. Bio-gel P2 fractionation of free Hyp amino acid (Panel A) or Hyp amino acid produced following base hydrolysis of the [AO]<sub>7</sub> acceptor substrate (Panel B). The column was calibrated as described in Fig. 4.
